# 1 **Genome-Epigenome Interactions Associated with Myalgic** 2 **Encephalomyelitis/Chronic Fatigue Syndrome**

3  
4 Santiago Herrera<sup>a,b,e</sup>, Wilfred C. de Vega<sup>a,b,c</sup>, David Ashbrook<sup>a,b</sup>,  
5 Suzanne D. Vernon<sup>d,f</sup>, Patrick O. McGowan<sup>a,b,c\*</sup>

6  
7 <sup>a</sup> Centre for Environmental Epigenetics and Development, University of Toronto, Scarborough,  
8 ON, Canada;

9 <sup>b</sup> Department of Biological Sciences, University of Toronto, Scarborough, ON, Canada; <sup>c</sup>  
10 Department of Cell and Systems Biology, University of Toronto, Toronto, ON, Canada;

11 <sup>d</sup> Solve ME/CFS Initiative, Los Angeles, CA, United States of America;

12 <sup>e</sup> Current affiliation: Department of Biological Sciences, Lehigh University, Bethlehem, PA,  
13 United States of America;

14 <sup>f</sup> Current affiliation: The Bateman Horne Center of Excellence, Salt Lake City, UT, United States  
15 of America

16 \*corresponding author [patrick.mcgowan@utoronto.ca](mailto:patrick.mcgowan@utoronto.ca)

## 17 **ABSTRACT**

18 Myalgic Encephalomyelitis/Chronic Fatigue Syndrome (ME/CFS) is an example of a complex  
19 disease of unknown etiology. Multiple studies point to disruptions in immune functioning in  
20 ME/CFS patients as well as with specific genetic polymorphisms and alterations of the DNA  
21 methylome in lymphocytes. However, the association between DNA methylation and genetic  
22 background in relation to the ME/CFS is currently unknown. In this study we explored this  
23 association by characterizing the genomic (~4.3 million SNPs) and epigenomic (~480 thousand  
24 CpG loci) variability between populations of ME/CFS patients and healthy controls. We found  
25 significant associations of methylation states in T-lymphocytes at several CpG loci and regions  
26 with ME/CFS phenotype. These methylation anomalies are in close proximity to genes involved  
27 with immune function and cellular metabolism. Finally, we found significant correlations of  
28 genotypes with methylation phenotypes associated with ME/CFS. The findings from this study  
29 highlight the role of epigenetic and genetic interactions in complex diseases, and suggest several  
30 genetic and epigenetic elements potentially involved in the mechanisms of disease in ME/CFS.

31

## 32 **Introduction**

33           Understanding the biological basis of complex traits and diseases remains one of the  
34 biggest challenges in biology and medicine. Chronic Fatigue Syndrome (also known as Myalgic  
35 Encephalomyelitis, hereafter referred to as ME/CFS) is an example of a complex, multifactorial  
36 disease with symptoms that vary substantially among patients. ME/CFS is a debilitating  
37 multisystem disease affecting between 1 and 2 million people in the United States alone <sup>1</sup>, with  
38 an annual economic impact between \$17 and \$24 billion <sup>2</sup>. Yet its biological basis remains  
39 largely unknown.

40           Multiple studies point to disruptions in the immune and neuroendocrine systems in  
41 ME/CFS patients <sup>3-14</sup>. ME/CFS appears to be associated with specific genetic polymorphisms <sup>15-</sup>  
42 <sup>17</sup>, as well as with alterations of the DNA methylome in lymphocytes <sup>14,18,19</sup>. Understanding the  
43 contribution of the genetic background in ME/CFS patients as a predisposing factor for  
44 epigenetic abnormalities associated with the disease is a fundamental step to elucidate its causes.  
45 This understanding is also key for the development of tools to identify risk factors and potential  
46 treatments.

47           T-cell lymphocytes appear to be a primary cell type underlying immune and  
48 neuroendocrine abnormalities observed in ME/CFS patients. Functional impairment in T-cell  
49 glucocorticoid receptor and increased dexamethasone sensitivity are characteristic of some  
50 ME/CFS patients <sup>14,20</sup>. Furthermore, genetic polymorphisms within non-coding regions of T-cell  
51 receptor loci <sup>15</sup>, as well as differential methylation in CD4<sup>+</sup> T helper lymphocyte cells (Brenu et  
52 al., 2014), have been associated with the disease. The possible interactions between genomic and  
53 T-cell epigenomic variation in ME/CFS remain unknown.

54           In this study, we aimed to explore the association between DNA methylation profiles of  
55 T-cells and single nucleotide polymorphisms (SNPs) in ME/CFS patients. We quantified  
56 lymphocyte proportions and isolated CD3<sup>+</sup> T-cells (including both CD4<sup>+</sup> T helper cells and CD8<sup>+</sup>  
57 T killer cells) via fluorescence activated cell sorting. We characterized the variation in genomic  
58 (~4.3 million SNPs) and epigenomic (~480 thousand CpG loci) variability among ME/CFS  
59 patients and healthy controls. Using this approach, we: 1) tested the association of genome-wide

60 SNP genotypes with ME/CFS disease status; 2) tested the association of differentially methylated  
61 CpG loci and regions in CD3<sup>+</sup> T-cells with ME/CFS disease status; 3) performed a methylation  
62 quantitative trait analysis to investigate the possible interactions between genetic background and  
63 methylation phenotypes of CD3<sup>+</sup> T-cells associated with ME/CFS disease status.

64

## 65 **Methods**

### 66 *Ethics approval and consent to participate*

67 This study adhered to the human experimentation guidelines as outlined by the  
68 Helsinki Declaration of 1975. The collection of and analysis of clinical information and  
69 biological samples by the SolveCFS BioBank was ethically approved by the Genetic Alliance  
70 ethics review board (IRB # IORG0003358) and the University of Toronto (IRB #27391), which  
71 also approved all procedures for obtaining written informed consent from all participants in the  
72 study. Two copies of the consent form were signed, with one copy provided to the participants  
73 and one copy under secure storage at the SolveCFS Biobank.

### 74 *Study population*

75 In total, 61 ME/CFS diagnosed patients receiving care at the Bateman Horne Center,  
76 Utah (46 females, 15 males) and 48 healthy control (36 females, 12 males) individuals were  
77 recruited for this study. Female to male ratios were nearly identical in both cases and controls  
78 (3:1). The sex ratio in our population of ME/CFS patients (cases) is consistent with previously  
79 reported ratios indicating predominance of this illness in females<sup>21-23</sup>. Diagnosis of ME/CFS  
80 was performed according to the 1994 Fukuda<sup>24</sup> and 2003 Canadian<sup>25</sup> criteria. To quantify  
81 functional impairment, individuals completed the standardized health-related quality of life  
82 survey RAND-36<sup>26</sup>. All individuals met the following criteria: 1) were HIV and Hepatitis-C  
83 negative; and 2) had no intake history of immunomodulatory or immunosuppressive  
84 medications. The Body Mass Index (BMI) of individuals ranged between 16.4 and 46 ( $\bar{x}$ =27.2,  
85  $s$ =6.4), with no significant differences between case and control groups (t-test  $p$ =0.5; Wilcoxon  
86  $p$ =0.74) (Fig. 1a). Similarly, age, which ranged between 18 and 62 years ( $\bar{x}$ =32.2,  $s$ =13.6), was  
87 not significantly different between cases and controls (t-test  $p$ =0.06; Wilcoxon  $p$ =0.07) (Fig. 1b).

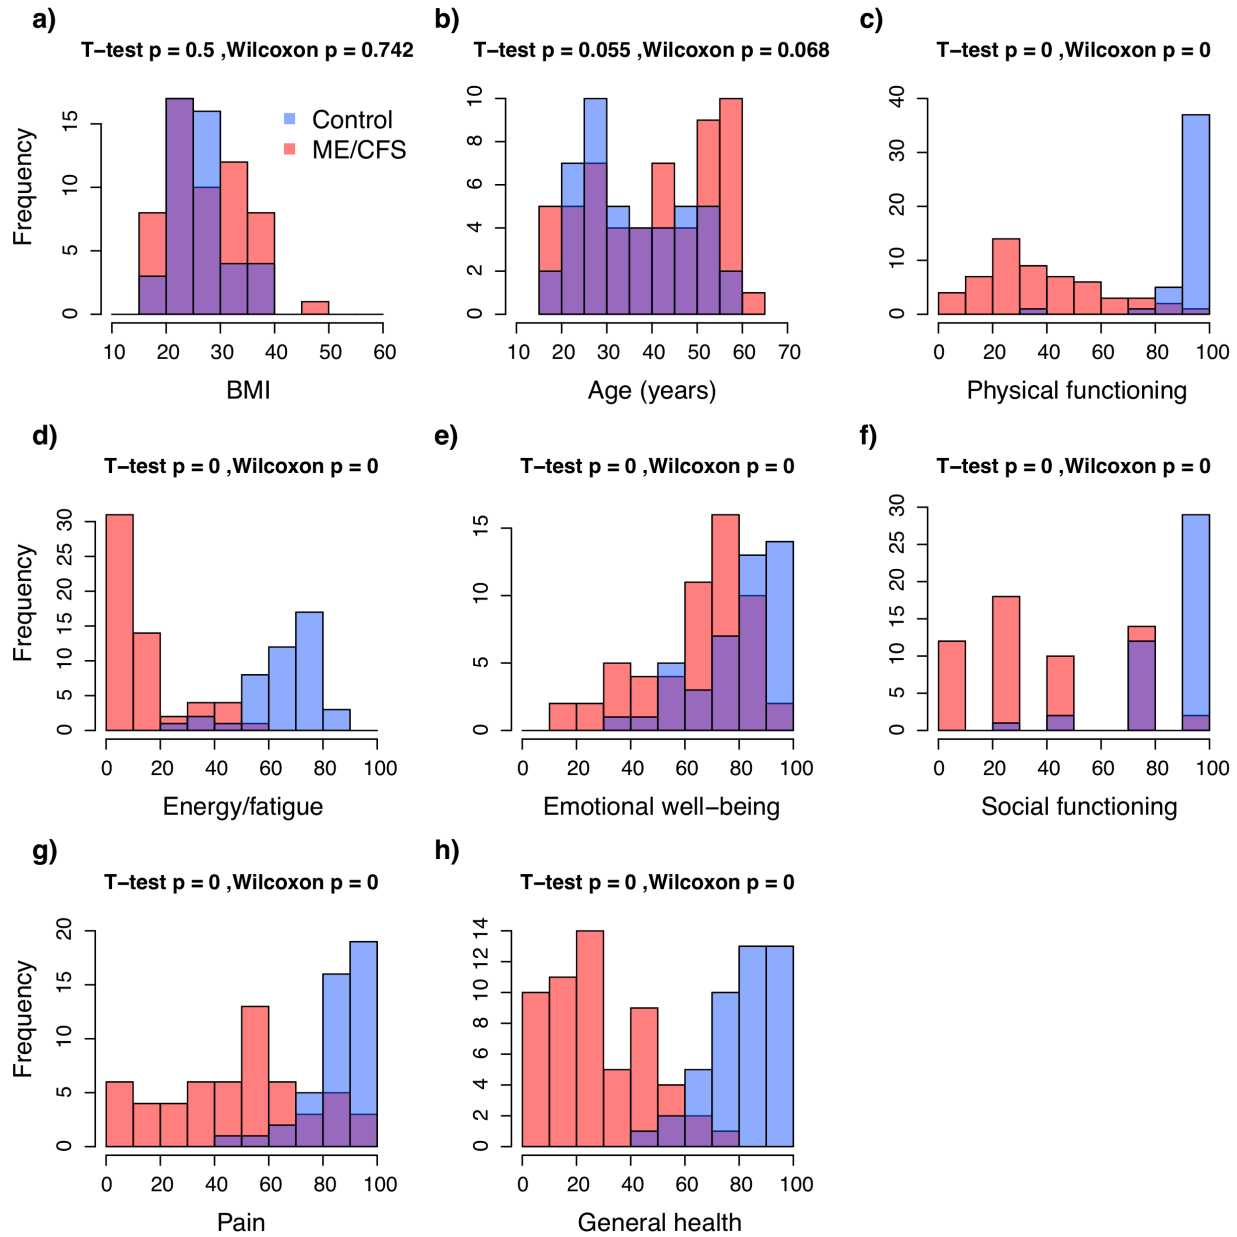

88

89 **Figure 1.** Frequency distributions of demographic and health-related indexes in the study population. **a)**  
 90 Body mass index; **b)** Age; **c-h)** RAND-36 quality of life scales. Colours indicate the healthy control  
 91 (blue,  $n = 48$ ) and ME/CFS (red,  $n = 61$ ) subpopulations.  $p$ -values from T-tests and Wilcoxon rank-sum  
 92 tests.

93

### 94 *Sample processing*

95

Whole blood from each individual was collected at the Bateman Horne Center and

96 shipped overnight to Precision for Medicine, Maryland for Peripheral Blood Mononuclear Cells  
97 (PBMC) separation following procedures described in <sup>14</sup>. PBMCs were separated into two  
98 aliquots of approximately 7 million cells each, and shipped in liquid nitrogen to the Centre for  
99 Environmental Epigenetics and Development at the University of Toronto.

100 The first PBMC aliquot per patient was used for single nucleotide polymorphism (SNP)  
101 genotyping using the Human Omni 5-4 Array (Illumina Inc.). This array examines Single  
102 Nucleotide Polymorphisms at ~4.3 million loci throughout the human genome. Genomic DNA  
103 purification was performed with the MasterPure™ Complete DNA and RNA Purification Kit  
104 (Epicentre) following the standard protocol for cell samples. DNA quantity and purity was  
105 assessed using a NanoDrop 2000c Spectrophotometer (Thermo Scientific). Genotyping with the  
106 Omni 5-4 array was performed at the Princess Margaret Genomics Centre in Toronto.

107 The second PBMC aliquot was used for DNA methylation profiling of T-cells (CD3+)  
108 using the Human Methylation 450K Array (Illumina Inc.). This array quantifies methylation at  
109 ~480 thousand CpG loci throughout the human methylome. To quantify the relative proportions  
110 of cell type in the PBMC sample (i.e. CD4+ T-cells, CD8+ T-cells, CD19+ B-cells, and CD14+  
111 monocytes) and isolate CD3+ T-cells, each sample was stained with fluorescently labelled  
112 antibodies and sorted in a FACSAria (BD Biosciences) flow cytometer at the Centre for Flow  
113 Cytometry and Microscopy of the Sunnybrook Research Institute in Toronto. Genomic DNA  
114 from T-cells was purified following the same procedure described above. Bisulfite conversion of  
115 purified DNA and CpG methylation profiling with the 450K Array was performed at the McGill  
116 University and Genome Quebec Innovation Centre in Montreal.

117

## 118 ***Genome-wide association analyses***

119 Analyses of SNP data quality and of association with ME/CFS disease phenotypes were  
120 performed with different parameters in the programs *GenABEL* <sup>27</sup> and *PLINK* <sup>28</sup>, following  
121 standardized protocols <sup>29,30</sup>. To minimize the number of false positive and negative associations,  
122 we first identified and excluded data from individuals that met one or more of the following  
123 criteria: 1) Inferred sex, as determined by the heterozygosity of the X chromosome, was  
124 incongruent with the known sex of the individual; 2) Heterozygosity rates or amount of missing  
125 data were outliers with respect to the whole population (Fig. 2a); 3) More than 10% of marker

126 data was missing; 4) Relatedness to other samples, as measured by the identity by descent (IBD)  
127 statistic, was greater than that of a second- to third-degree relative ( $IBD > 0.1875$ ); 5) Ancestry, as  
128 determined by a principal components analysis (PCA) (Fig. 2b) performed with *EIGENSOFT*  
129 <sup>31,32</sup>, was substantially different than that of the majority population in our cohort (i.e. European  
130 ancestry). Data from 10 individuals were excluded from all analyses: 4 cases (2 females, 2  
131 males) and 6 controls (6 females). In addition to these criteria, we re-analysed the data excluding  
132 individuals with health-related quality of life measurements that overlapped between cases and  
133 controls. This exclusion of intermediate illness phenotypes was aimed at increasing the power to  
134 detect possible associations between disease status and (epi)genotypes by decreasing the  
135 heterogeneity in phenotype symptomatology within each group. We utilized the scores of  
136 RAND-36 scales (physical functioning, energy/fatigue, emotional well-being, social functioning,  
137 pain, and general health) as quantitative measurements of ME/CFS phenotypes because these  
138 were significantly different ( $\alpha = 0.05$ ) between case and control groups, prior to excluding  
139 individuals with intermediate phenotypes (Figs. 1c-h). RAND-36 scale scores were summarized  
140 into principal components (PC) using the *stats* package in R. We excluded data from case and  
141 control individuals with overlapping values along PC1 (Fig. 3), which explained ~80% of  
142 variance in the RAND-36 data. In total, data from 30 individuals were excluded using this  
143 approach: 18 cases (12 females, 6 males) and 12 controls (9 females, 3 males). These data were  
144 re-analysed in *PLINK*.

145

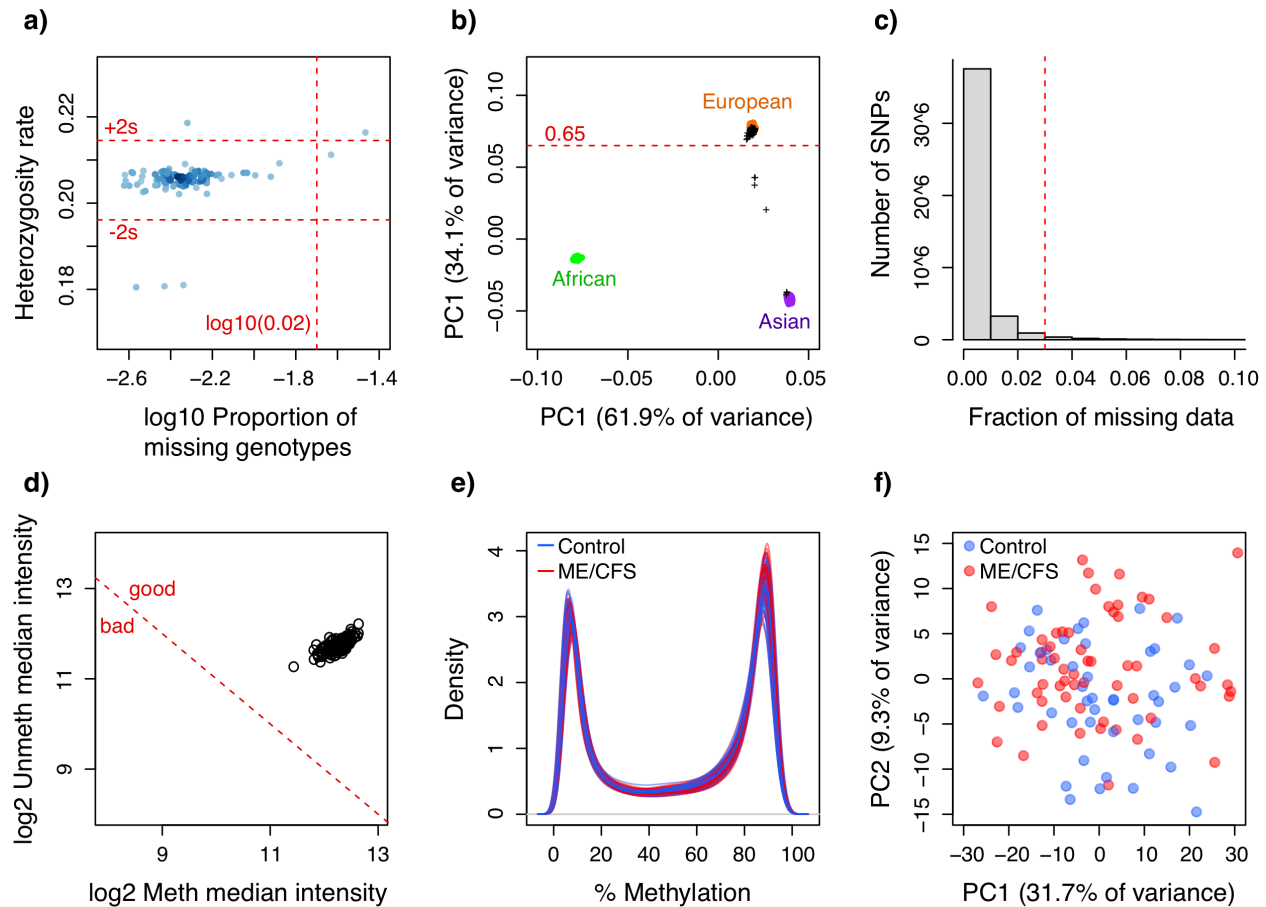

146  
 147 **Figure 2.** Quality control plots for SNP and CpG methylation data. **a)** Scatterplot of the proportion of  
 148 missing genotypes vs. heterozygosity rate, per individual. Dot colour intensity indicates individual sample  
 149 density. Horizontal red dotted lines indicate quality thresholds of  $\pm 2$  standard deviations. Vertical red  
 150 dotted line indicates a 2% missing data threshold; **b)** Inferred ancestry of individuals according to a  
 151 principal components analysis of genotypes. The first two principal components are plotted. Genotype  
 152 data from individuals from reference populations (African, Asian and European) were obtained from the  
 153 HapMap Phase III (HapMap3) database. Black crosses indicate individuals from this study. Horizontal  
 154 red dotted line indicates European ancestry threshold; **c)** Frequency distribution of the fraction of missing  
 155 data per SNP locus. Red dotted line indicates the 3% quality threshold; **d)** Scatterplot of median  
 156 methylated and unmethylated fluorescence signals per individual. Dotted red line indicates quality  
 157 threshold suggested in *minfi*; **e)** Methylation percentage (beta-values x 100) density distribution per  
 158 individual; **f)** Scatterplot of the two principal components summarizing the variability in the methylation  
 159 data per individual. For **e-f** colours indicate ME/CFS case (red, n = 61) or control (blue, n = 48) status of  
 160 each individual.  
 161



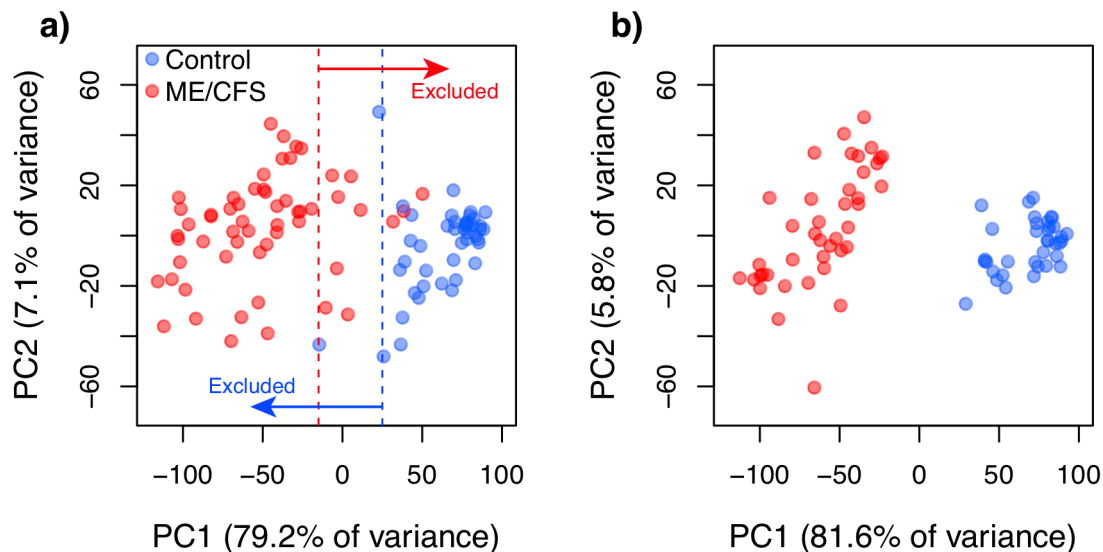

162  
163 **Figure 3.** Scatterplots of the two principal components summarizing the variability in the standardized  
164 health-related quality of life surveys (RAND-36) per individual. **a)** Before exclusion of data from  
165 individuals with intermediate (overlapping) phenotypes along PC1. Dotted lines indicate the thresholds  
166 used to define intermediate phenotypes; **b)** After exclusion of data from individuals with intermediate  
167 phenotypes. Colours indicate the healthy control (blue, **a)** n = 48; **b)** n = 36) and ME/CFS (red, **a)** n = 61;  
168 **b)** n = 43) subpopulations.

169  
170 After excluding individuals with sub-optimal data, we identified and excluded data from  
171 SNP loci that met one or more of the following criteria following<sup>29,30</sup>: 1) Rate of missing  
172 genotypes was greater than 3% in *PLINK* (5% in *GenABEL*) (**Fig. 2c**); 2) Rate of missing data  
173 was significantly different ( $p < 0.00001$ ) between cases and controls; 3) Allelic frequencies  
174 significantly deviated from Hardy-Weinberg equilibrium ( $\chi^2 p < 0.00001$  in *PLINK*, FDR < 0.2 in  
175 *GenABEL*); and 4) Minimum allele frequency was smaller than 1% in *PLINK* (2% in  
176 *GenABEL*). Out of 4,284,426 genotyped SNP loci, 1,779,031 SNP loci were excluded from  
177 *PLINK* analyses, and 2,142,548 from *GenABEL* analyses.

178 We examined possible associations between SNP genotypes and ME/CFS disease  
179 phenotypes (case or control) using  $\chi^2$  testing as well as logistic regression tests that included  
180 covariates of age, sex and BMI in both *PLINK* and *GenABEL*. To account for the uncertainty in  
181 the potential genetic model of inheritance of ME/CFS, we performed multiple tests with different  
182 underlying models: Genotypic, dominant, recessive, Cochran-Armitage trend, and allelic for the



183 simple  $\chi^2$  tests; and genotypic, dominant, recessive and multiplicative for logistic regressions.  
184 No inflation of test statistics was observed in any test ( $\lambda$  ranged between 1 and 1.01). To assess  
185 the significance of associations we: 1) Adjusted raw  $p$ -values for multiple testing following the  
186 Bonferroni<sup>33</sup>, Holm<sup>34</sup>, and Benjamini and Hochberg false discovery rate (FDR) corrections<sup>35</sup>;  
187 and 2) Calculated corrected (empirical)  $p$ -values (family wise) after 10,000 permutations. We  
188 generated spatial visualizations of raw  $p$ -values for all associations across chromosomes using  
189 the program *Haploview*<sup>36</sup>. Due to the higher prevalence of ME/CFS in females than males<sup>21-23</sup>,  
190 association tests were also performed in data from females only.

191

## 192 ***SNP characterisation***

193 SNPs with significant associations were examined using the following reference tools:  
194 the NHGRI-EBI catalogue of genome-wide association studies  
195 (<http://www.ebi.ac.uk/gwas/home>;<sup>37</sup>, the Ensembl genome browser  
196 ([http://www.ensembl.org/Homo\\_sapiens/Info/Index](http://www.ensembl.org/Homo_sapiens/Info/Index);<sup>38</sup>, the Single Nucleotide Polymorphisms  
197 Annotator SNIIPA (<http://snipa.helmholtz-muenchen.de/snipa3/>;<sup>39</sup>, the Genotype-Tissue-  
198 Expression database GTEx (<https://www.gtexportal.org/home/>;<sup>40</sup>, the genome-wide association  
199 study of blood plasma proteome database pGWAS ([http://metabolomics.helmholtz-  
200 muenchen.de/pgwas/](http://metabolomics.helmholtz-muenchen.de/pgwas/);<sup>41</sup>, and the developing brain methylation quantitative trait loci database  
201 (<http://epigenetics.essex.ac.uk/mQTL/>;<sup>42</sup>.

202

## 203 *Re-analysis of published GWAS data*

204 Data from the ME/CFS genome-wide association study (GWAS) by Schlauch et al.  
205 (2016), were acquired from dbGAP (phs001015.v1.p1), and re-analysed following the pipeline  
206 described above to identify commonalities. The *crlmm* R Bioconductor package<sup>43,44</sup> was used  
207 for genotyping, and analysed in *GenABEL*, using the same thresholds as above. 704,464 SNP  
208 markers from 66 subjects passed our quality controls (44 females and 22 males, 36 cases and 30  
209 controls). Because of the different arrays used (Illumina Human Omni 5-4 Array in this study vs.  
210 Affymetrix Genome-Wide Human SNP Array 6.0 used by Schlauch et al.) we constructed

211 linkage disequilibrium (LD) proxies using *LDlink*<sup>45</sup>, with  $R^2 \geq 0.8$ , to make the results  
212 comparable.

213

## 214 ***Gene-set analysis***

215 The program *MAGMA*<sup>46</sup> was used to complete a generalized gene-set analysis of the  
216 SNP data. This analyses focuses on genetic associations with phenotype at the level of genes and  
217 gene-sets rather than individual SNPs. This strategy augments the power to detect associations  
218 with complex traits and diseases, such as ME/CFS. Gene sets were taken from Molecular  
219 Signatures Database (MSigDB)<sup>47</sup>, including hallmark gene sets (hallmark gene sets summarize  
220 and represent specific well-defined biological states or processes and display coherent  
221 expression;<sup>48</sup>), canonical pathways (gene-sets from KEGG, BioCarta and Reactome) and GO  
222 gene sets (gene-sets that contain genes annotated by the same gene ontology term).

223

## 224 ***Epigenome-wide association analyses***

225 Analyses of CpG methylation data quality and of association with ME/CFS disease  
226 phenotypes were performed in the R package *minfi*<sup>49</sup>, following the pipeline suggested by<sup>50</sup>. All  
227 individuals identified for exclusion during the genome-wide association analyses were also  
228 excluded from this dataset to increase the power of detection of possible associations. In  
229 addition, we attempted to identify data from individuals that could represent potential outliers by  
230 the following graphical approaches (as suggested by<sup>49</sup>): 1) Comparing inferred sex versus  
231 known sex; 2) Examining intensity distributions of control CpG probes; 2) Plotting median  
232 methylated and unmethylated fluorescence signals; 3) Plotting methylation percentage density  
233 distributions; and 4) Summarizing the variability in the methylation data through a principal  
234 component analysis. No individuals were identified as outliers (**Figs. 2d-f**). We discarded data  
235 from CpG loci that: 1) Contained known SNPs at the methylation dinucleotide; or 2) Contained  
236 missing data. Raw probe fluorescence intensities were normalized by Subset-Quantile Within  
237 Array Normalization<sup>51</sup>, which takes into account the differences between Infinium type I and II  
238 probes. The level of methylation in each CpG locus was measured as beta-values, ranging from 0  
239 to 1, which represent the proportion of methylation. In total, 467,971 CpG loci (out of 485,512)

240 were retained for further analyses.

241 We examined possible associations between methylation levels at CpG loci and ME/CFS  
242 disease phenotypes (case or control) through F-tests of logit-transformed beta-values<sup>52</sup> as  
243 implemented in the *dmpFinder* function. To correct for potential confounding effects of multiple  
244 methylation array batches (two in this study), as well as covariates of age, sex and BMI, we  
245 utilized the empirical Bayes procedure implemented in the R package *ComBat*<sup>53</sup>. To assess  
246 significance of associations ( $\alpha = 0.05$ ) we: 1) adjusted raw *p*-values for multiple testing by  
247 performing Benjamini and Hochberg false discovery rate (FDR) corrections; and 2) calculated  
248 empirical *p*-values after 10,000 permutations as described in<sup>14</sup>. In addition to testing for  
249 associations at individual CpG loci, we performed tests of association at differentially  
250 methylated genomic regions using the R package *bumphunter* as described in<sup>54</sup>. Genomics  
251 regions were defined as clusters of CpG loci within a 500bp region. We assessed the significance  
252 of associations ( $\alpha = 0.05$ ) by calculating empirical *p*-values from null distributions of test  
253 statistics after 1,000 bootstrap pseudoreplicates.

254

### 255 ***Genome-epigenome association analyses***

256 To identify associations between SNP genotypes and methylation levels at significantly  
257 differentially methylated CpG loci, we performed a methylation quantitative trait loci (mQTLs)  
258 analysis using linear additive regression models (including covariates) in the R package *Matrix*  
259 *eQTL*<sup>55</sup>. Only local cis-mQTL were considered, i.e. CpG-SNP pairs that are within 1Mbp of  
260 each other. Both CpG loci and SNPs were mapped to the UCSC human genome assembly  
261 version hg19 (Genome Reference Consortium GRCh37)<sup>56</sup>. mQTLs were considered significant  
262 when FDR corrected *p*-values were smaller than  $\alpha = 0.05$ .

263

### 264 ***Enrichment analysis***

265 We carried out gene-set enrichment analyses for genes of interest. The R package  
266 *clusterProfiler* 3.4.4<sup>57</sup> was used for Gene Ontology Biological Process (GO BP)<sup>58,59</sup> and KEGG  
267 pathway<sup>60,61</sup> enrichment analysis, with *p* and *q* value cut-offs of  $\leq 0.05$ . Reactome pathway  
268 analyses were carried out using the *ReactomePA* 1.20.2 R package<sup>62</sup>, with a *p*-value cut-off of  $\leq$

269 0.05. All three packages reference the latest versions of their respective databases. These  
270 significantly enriched annotations were visualized with the ‘enrichMap’ function of *DOSE* 3.2.0  
271 R package <sup>63</sup>, with specific parameters to aid legibility using different numbers of enriched  
272 annotations.

273

## 274 **Results & Discussion**

### 275 *Lymphocyte proportions*

276 In contrast to the significant differentiation in health-related quality of life RAND-36  
277 scales between ME/CFS cases and healthy controls (Fig. 1c-h), there were no differences in the  
278 relative proportions of cell types in the PBMC lymphocyte samples (Fig. 4). Previous studies  
279 investigating potential differences in the relative proportions of general lymphocyte types in  
280 ME/CFS patients have produced incongruent results which have ranged from an increased  
281 proportion of CD8+ T cells (Klimas et al., 1990) to no significant differences <sup>7,64</sup>. These  
282 observations suggest that alterations of general lymphocyte type proportions may not be a  
283 characteristic feature of ME/CFS. Rather, abnormalities in immune system functioning  
284 associated with ME/CFS appear to involve alterations in the activity and abundance of specific  
285 sub-populations <sup>5,6,65</sup>.

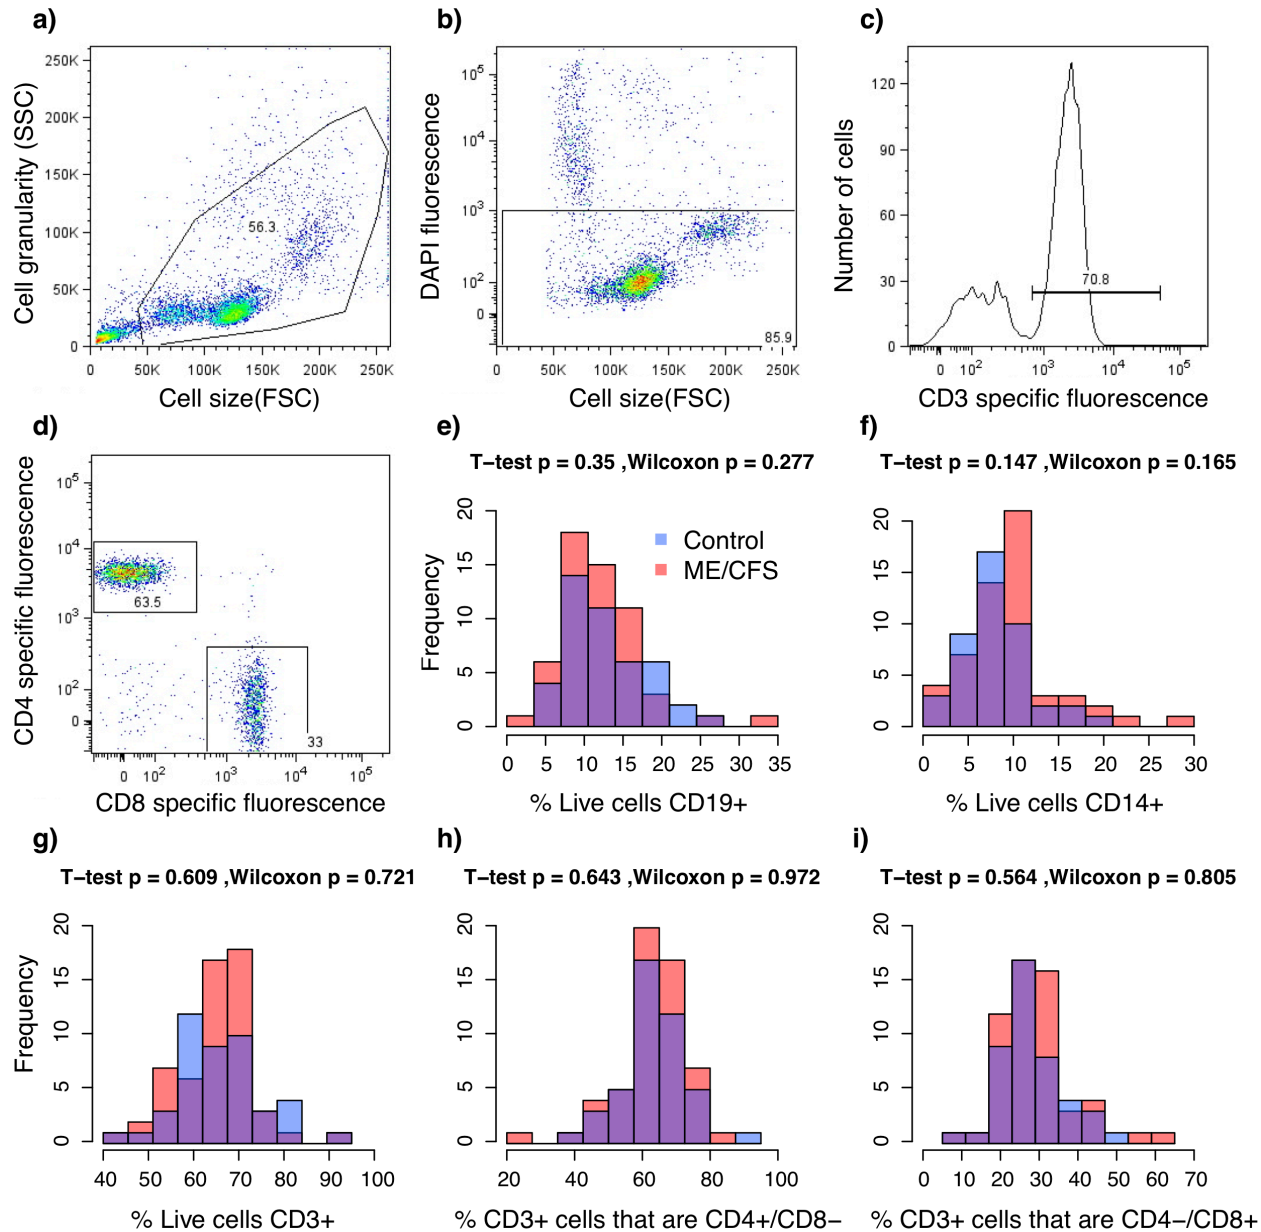

286

287 **Figure 4.** Results from fluorescence-activated cell sorting (FACS) of PBMCs. **a-d** Representative  
 288 example of sorting parameters from one individual. **a)** Total particle composition of sample before gating;  
 289 **b)** Gated cells showing live cells in rectangle; **c)** Frequency of gated T-cells (CD3+); **d)** CD4/CD8  
 290 expression on CD3+ gated cells. **d-i** Frequency distributions of relative proportions of cell types per  
 291 individual. Colors indicate the healthy control (blue, n = 48) and ME/CFS (red, n = 61) subpopulations. *p*-  
 292 values from T-tests and Wilcoxon rank-sum tests. **e)** CD19+ B-cells; **f)** CD14+ monocytes; **g)** CD3+ T-  
 293 cells; **h)** CD4+/CD8- T-cells; **i)** CD4-/CD8+ T-cells.

294

## 295 **Genetic associations with ME/CFS**

296 None of the more than 2 million variable SNP loci targeted in this study had a significant  
297 association ( $\alpha = 0.05$ ) with ME/CFS after  $p$ -value corrections with Bonferroni, Holm, Benjamini  
298 and Hochberg, or permutation methods when data from both sexes were analysed together. This  
299 result was consistent across all the  $\chi^2$  and logistic regression tests (Figs. 5a-b summarize the  
300 results of the simple  $\chi^2$  genotypic test as a representative example). Because of the known  
301 increased prevalence of ME/CFS in females<sup>21-23</sup>, we performed independent analyses of data  
302 from females only. These analyses revealed a significant association ( $\chi^2$  genotypic test,  
303 permutation-corrected  $p$ -value = 0.0374, OR = 0.1845, 1/OR = 5.42) of one SNP (rs11712777,  
304 chr3:42347678) with the ME/CFS disease phenotype.

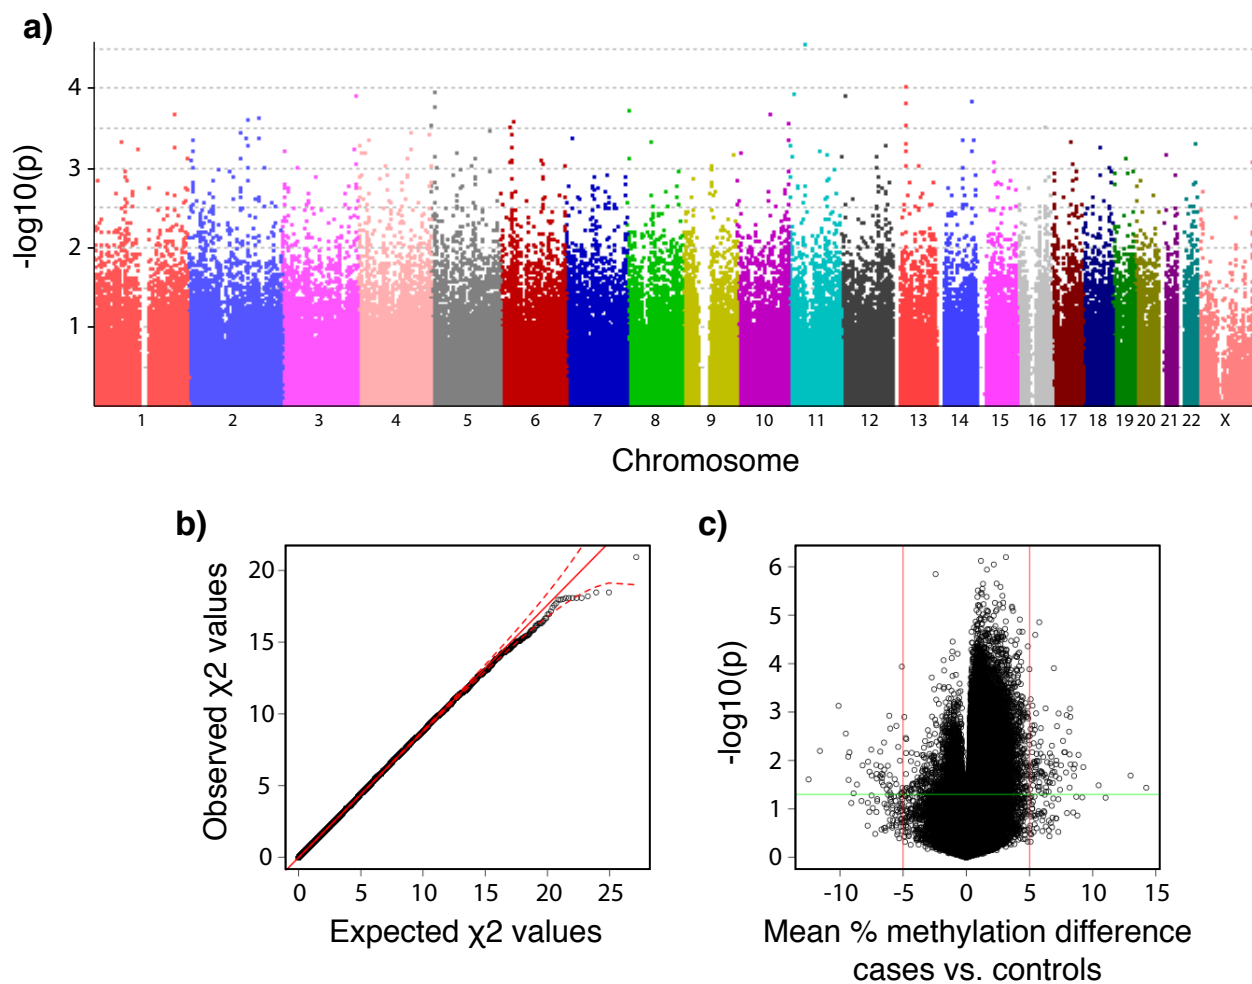

305 **Figure 5.** Plots summarizing the strength of associations between SNP genotypes and DNA methylation  
306 levels to disease phenotypes (healthy controls,  $n = 36$ ; vs. ME/CFS cases,  $n = 43$ ) in data from males and  
307 females subpopulations. **a)** Manhattan plot of  $p$ -values calculated from the simple  $\chi^2$  genotypic test of  
308

309 association for 2,505,395 SNPs (*PLINK* analysis). Currently accepted genome-wide significance  
310 threshold is  $5 \times 10^{-8}$  (7.3 in  $-\log_{10}$  units). Bonferroni's adjustment significance threshold for this study is  
311  $2 \times 10^{-8}$  (7.7 in  $-\log_{10}$ ); **b**) Quantile-quantile plots of expected vs. observed  $\chi^2$  test statistics from the  
312 simple  $\chi^2$  genotypic test of association. Red solid line indicates the middle of the first and third quartile of  
313 the expected distribution of the  $\chi^2$  test statistics. Red dashed lines indicate the 95% confidence intervals  
314 of the expected distribution of the  $\chi^2$  test statistics; **c**) Volcano plot of effect size (mean percentage DNA  
315 methylation difference between ME/CFS and controls) vs. association empirical *p*-values calculated after  
316 10,000 random permutations. Vertical red lines indicate biological significance threshold of 5% absolute  
317 difference in methylation at each locus. Horizontal green line indicates statistical significance threshold of  
318  $p < 0.05$ .

319         These results are contrasting to previous genotype association analyses in ME/CFS  
320 populations, which have found statistically significant associations in multiple loci. The earliest  
321 study by Smith et al. (2011) evaluated 116,204 SNPs (n=40 CFS, n=40 non-ME/CFS) using the  
322 Affymetrix GeneChip Mapping 100K array, and found 65 SNPs associated with ME/CFS  
323 ( $p < 0.001$ ). Rajeevan (2015) used the Affymetrix Immune and Inflammation Chip to focus on  
324 ~11,000 SNPs located in genes involved in immune and inflammation pathways (n=121  
325 ME/CFS, n=50 non-ME/CFS). Of these, 32 were associated with ME/CFS ( $p < 0.05$ ). Most  
326 recently, Schlauch et al. (2016) evaluated 906,600 SNPs with the Affymetrix Genome-Wide  
327 SNP Array 6.0 (n=42 ME/CFS, n=38 non-ME/CFS) and found 442 SNPs that were associated  
328 with ME/CFS ( $P < 3.3 \times 10^{-5}$ ). The SNP that we found in significant association with ME/CFS in  
329 females, rs11712777, was not included in any of these datasets. One SNP in the Schlauch et al.  
330 (2016) data, rs1468604, is in linkage disequilibrium (LD) with rs11712777 ( $r^2 = 0.8716$ ;  
331 European population). The apparent discrepancy could be explained by the imperfect linkage  
332 between the two SNPs, and therefore we recommend rs11712777 as a candidate for direct  
333 genotyping in future studies.

334         There are no other overlaps in the SNPs or genes associated with ME/CFS between this  
335 study and previous genetic association studies. This observation may be confounded by a  
336 combination of multiple factors, including: 1) Differences in the types of arrays utilized in each  
337 study (our study, with the largest genetic coverage to date, evaluated two-orders of magnitude  
338 more SNPs than the Rajeevan (2015) study); 2) Differences among cohorts due to the wide  
339 heterogeneity of ME/CFS; 3) Reduced statistical power to discriminate the effects of multiple



340 small-effect variants due to relatively small sample sizes; and 4) Interactions with environmental  
341 and epigenetic factors. Additional larger-scale genome-wide association studies with overlapping  
342 SNP probes and larger sample sizes will further our understanding of the interaction between  
343 genetic factors and ME/CFS.

344 Generalized gene-set analysis of the SNP data in *MAGMA* did not identify any gene-set  
345 significantly enriched in either our data, or the data from Schlauch et al. (2016).

346

### 347 ***Characterisation of SNP rs11712777***

348 We used a variety of online reference resources to characterize the current knowledge of  
349 rs11712777, and how it may influence ME/CFS phenotype (see Methods section). We also  
350 examined SNPs in high LD with SNP rs11712777 ( $R^2 \geq 0.8$ ; **Table 1**). The Genotype-Tissue-  
351 Expression database (GTEx) indicates that rs11712777, and the genes in LD with it, form an  
352 expression quantitative trait loci (eQTL) altering the expression of the CCK (cholecystokinin  
353 peptide hormone) gene. CCK has a number of active forms, expressed in a variety of tissues,  
354 including the blood, intestine and blood <sup>66</sup>, and plays a role in appetite, body weight and the  
355 immune system <sup>66,67</sup>. A rat knockout (KO) of the cholecystokinin B receptor (CCKBR) shows  
356 attenuated sickness behaviour <sup>68</sup>. This sickness behaviour in rats has remarkable similarity to  
357 some of the symptoms of ME/CFS <sup>69</sup>, including fatigue, malaise, hyperalgesia, sleepiness,  
358 anhedonia, weight loss and diminished activity <sup>69</sup>. CCK is also co-localized with sleep-promoting  
359 preoptic neurons in the hypothalamus <sup>70</sup>, which may relate to fatigue and unrefreshing sleep  
360 symptoms in ME/CFS. Finally, recent evidence suggests that CCK has a role regulating the  
361 differentiation of CD4+ T-cells <sup>71</sup>, and that CCK-expressing neurons are a critical cellular  
362 component of the hypothalamic–pituitary–adrenal axis <sup>72</sup>. These roles of CCK in components of  
363 the immune system are consistent with suggested immune dysregulation in ME/CFS <sup>3–8,14</sup>. While  
364 CCK-associated variant rs11712777 may be a biologically relevant candidate influencing  
365 susceptibility to ME/CFS, our findings suggest that it only accounts for a small fraction of the  
366 risk (OR = 0.1845). However, it constitutes a relevant target for future research.

367 In addition to rs11712777, SNP rs17223780 ( $R^2 = 0.8799$ ) binds DNase in CD14+  
368 monocytes (<http://www.regulomedb.org/snp/chr3/42363368>), indicating a possible regulatory  
369 role in the immune system. Another SNP in the vicinity of rs11712777 ( $D' = 0.7211$ ,  $R^2 =$

370 0.0126), rs33449 (chr3:42400801), is associated with increased daytime resting duration  
 371 (<http://www.ebi.ac.uk/gwas/search?query=3:42347678-42372207>; <sup>73</sup>). This is a phenotype that  
 372 may be related to the fatigue aspect of ME/CFS.

373  
 374 **Table 1.** SNPs in high LD ( $R^2 \geq 0.8$ ) with candidate SNP rs11712777. MAF = Minor allele frequency.  
 375 Adapted from <https://analysistools.nci.nih.gov/LDlink/>.

| RS number  | Coordinate    | Alleles | MAF    | Distance | D'     | R <sup>2</sup> | Correlated alleles |
|------------|---------------|---------|--------|----------|--------|----------------|--------------------|
| rs11712777 | chr3:42347678 | (C/T)   | 0.3877 | 0        | 1      | 1              | C=C,T=T            |
| rs17223780 | chr3:42363369 | (C/T)   | 0.3598 | 15691    | 0.9955 | 0.8799         | C=C,T=T            |
| rs11715412 | chr3:42368008 | (A/G)   | 0.3608 | 20330    | 0.991  | 0.8757         | C=A,T=G            |
| rs1966393  | chr3:42368673 | (G/A)   | 0.3608 | 20995    | 0.991  | 0.8757         | C=G,T=A            |
| rs17224501 | chr3:42369441 | (G/A)   | 0.3608 | 21763    | 0.991  | 0.8757         | C=G,T=A            |
| rs1468604  | chr3:42368882 | (T/C)   | 0.3618 | 21204    | 0.9865 | 0.8716         | C=T,T=C            |
| rs35392307 | chr3:42372207 | (G/A)   | 0.3579 | 24529    | 0.9909 | 0.8643         | C=G,T=A            |

376  
 377 ***Epigenetic associations with ME/CFS***  
 378 Of the 467,971 CpG loci analysed, 141 had significant associations with the ME/CFS  
 379 phenotype (raw  $p$ -value  $< 0.05$ ) and a mean percentage methylation difference between cases and  
 380 controls greater than 5% when data from both sexes were analysed together (Fig. 5c). None of  
 381 these differentially methylated loci were significant after FDR corrections, however 133 had  
 382 significant empirical  $p$ -values  $< 0.05$  calculated through permutation analyses (these are referred  
 383 to as differentially methylated probes - DMPs; Supplementary Table S1). Analyses of  
 384 methylation data from females alone indicated that 108 CpG loci had significant associations  
 385 with the ME/CFS phenotype (raw  $p$ -value  $\leq 0.05$ ) and a mean percentage methylation difference  
 386 between cases and controls greater than 5%. None of these differentially methylated loci were  
 387 significant after FDR corrections, however 94 DMPs had significant empirical  $p$ -values  $\leq 0.05$   
 388 after permutation analyses (Supplementary Table S2). Out of these 94 DMPs, 29 were common  
 389 to the DMPs found when analysing the data from both sexes combined.

390 Approximately half of the DMP were clustered in differentially methylated regions  
 391 (DMRs). We found 17 DMRs with significant association with the ME/CFS phenotype ( $p$ -value

392 < 0.05) when data from both sexes were analysed together (Supplementary Table S3). There  
393 were 22 DMRs when only females were considered (Supplementary Table S4). All of these  
394 regions were located nearby genes. 5 DMRs were found upstream of genes, 3 in promoters, 3  
395 overlapping the 5' end and 1 the 3' end of genes, 10 inside introns, and 3 downstream of genes.  
396 DMR length, in terms of number of CpG loci ranged between 2 and 10 (average 2.72). 7 DMRs  
397 containing CpG loci identified as DMPs were detected in common between analyses of  
398 methylation data from both sexes and from females only (Figure 6).

399 These results are in contrast with previous findings by our group, which revealed  
400 thousands to tens of thousands of differentially methylated CpG loci associated with ME/CFS in  
401 PBMCs, using the same 450K array<sup>14,18</sup>. It is possible that differences between the targeted cell  
402 populations (i.e. PBMCs vs. isolated T-cells) may have contributed to the differences in the  
403 number of differentially methylated CpGs. The number of cell types within PBMCs may broaden  
404 the spectrum of epigenetic marks and thus increase the number of possible associations with the  
405 ME/CFS disease phenotype. Consistent with this idea, Brenu et al (2014) found 120  
406 differentially methylated CpGs associated with ME/CFS in CD4+ T-cells (p<0.001) using the  
407 450K array (n=25 ME/CFS, n=18 non-ME/CFS). This number of differentially methylated CpGs  
408 is similar to the 133 DMPs we found in this study, which targeted a broader T-cell population  
409 (including CD4+ and CD4- T-cells). However, the only overlap between our study and the study  
410 from Brenu et al (2014) corresponded to the HLA-DQB1 (major histocompatibility complex,  
411 class II, DQ beta 1) gene. HLA-DQB1 encodes a protein that is part of the DQ heterodimer, a  
412 cell surface receptor that is essential in immune signalling. We found two contiguous  
413 differentially methylated regions within an intron of this gene (Supplementary Tables S1 and S3,  
414 Figure 6). One region was hypermethylated whereas the other was hypomethylated in the  
415 ME/CFS group. Interestingly, the gene HLA-DQB1 contained cis-mQTLs significantly  
416 associated with these two DMRs (see next section, as well as Supplementary Table S5, and  
417 Figure 6). Brenu et al. (2014) found CpG hypermethylation associated with the HLA-DQB1  
418 gene, however the specific location of this association was not reported. Recent studies focusing  
419 on CD4+ T-cells of patients affected by immune disorders such as rheumatoid arthritis<sup>74</sup> and  
420 multiple sclerosis<sup>75</sup> have found differential methylation in HLA-DQB1. This result is consistent  
421 with a potential immune dysregulation in ME/CFS.

422 We found 31 genes associated with DMPs in T-cells that were common to this study and

423 a previous study by our group<sup>14</sup>. These genes, which include PAX8 (paired box 8), and ATP4B  
424 (ATPase H<sup>+</sup>/K<sup>+</sup> transporting beta subunit) (**Supplementary Table S1**), are involved in the  
425 regulation of cellular processes and cell signaling. This is in line with recent ME/CFS work that  
426 observed differences in cellular metabolism in ME/CFS<sup>76–78</sup>.

427 Our results suggest that DNA methylation modifications in T-cells in ME/CFS are  
428 associated with the cellular metabolism differences that are observed in the disease and may play  
429 a role in the development of these phenotypic differences, however future work is required to  
430 understand this relationship.

431

### 432 ***Genetic and epigenetic interactions associated with ME/CFS***

433 All the DMPs identified according to empirical *p*-values had significant associations  
434 (FDR corrected *p*-values < 0.05) with SNP genotypes (independent of disease phenotype). In  
435 total there were 13,060 significant cis-mQTLs (**Supplementary Table S5**). **Figure 6** shows the  
436 strongest SNP-DMPs cis-mQTLs associations (according to correlation coefficient R<sup>2</sup>) in each of  
437 the 7 DMP-containing DMRs that were common in analyses of methylation data from both sexes  
438 and from females only.

439 SPATC1L (spermatogenesis and centriole associated 1 like) and DUSP22 (dual  
440 specificity phosphatase 22) were the two genes containing cis-mQTLs with the largest  
441 differentially methylated regions: 11 DMPs (7 hypermethylated probes in 5' UTR and 4  
442 hypomethylated probes in 3' UTR region) in SPATC1L and 10 hypermethylated probes in the 5'  
443 UTR of DUSP22 (**Supplementary Table S3 and Figure 6**). While the exact function of SPATC1L  
444 is not well understood, it has been previously associated with xenobiotic response and  
445 differential methylation in the promoter of this gene is characteristic of certain ethnic groups in  
446 human populations<sup>79</sup>. DUSP22 hypermethylation has also been observed in the 5' UTR region  
447 in T-cells of rheumatoid arthritis patients<sup>80</sup>. In T-cells, DUSP22 is known to inhibit proliferation  
448 and autoimmunity through inactivating Lck and preventing the activation of the T-cell receptor  
449<sup>81</sup>. However, it remains to be confirmed how hypermethylation in the 5' UTR region affects the  
450 overall activity of DUSP22 in T-cells of ME/CFS patients.

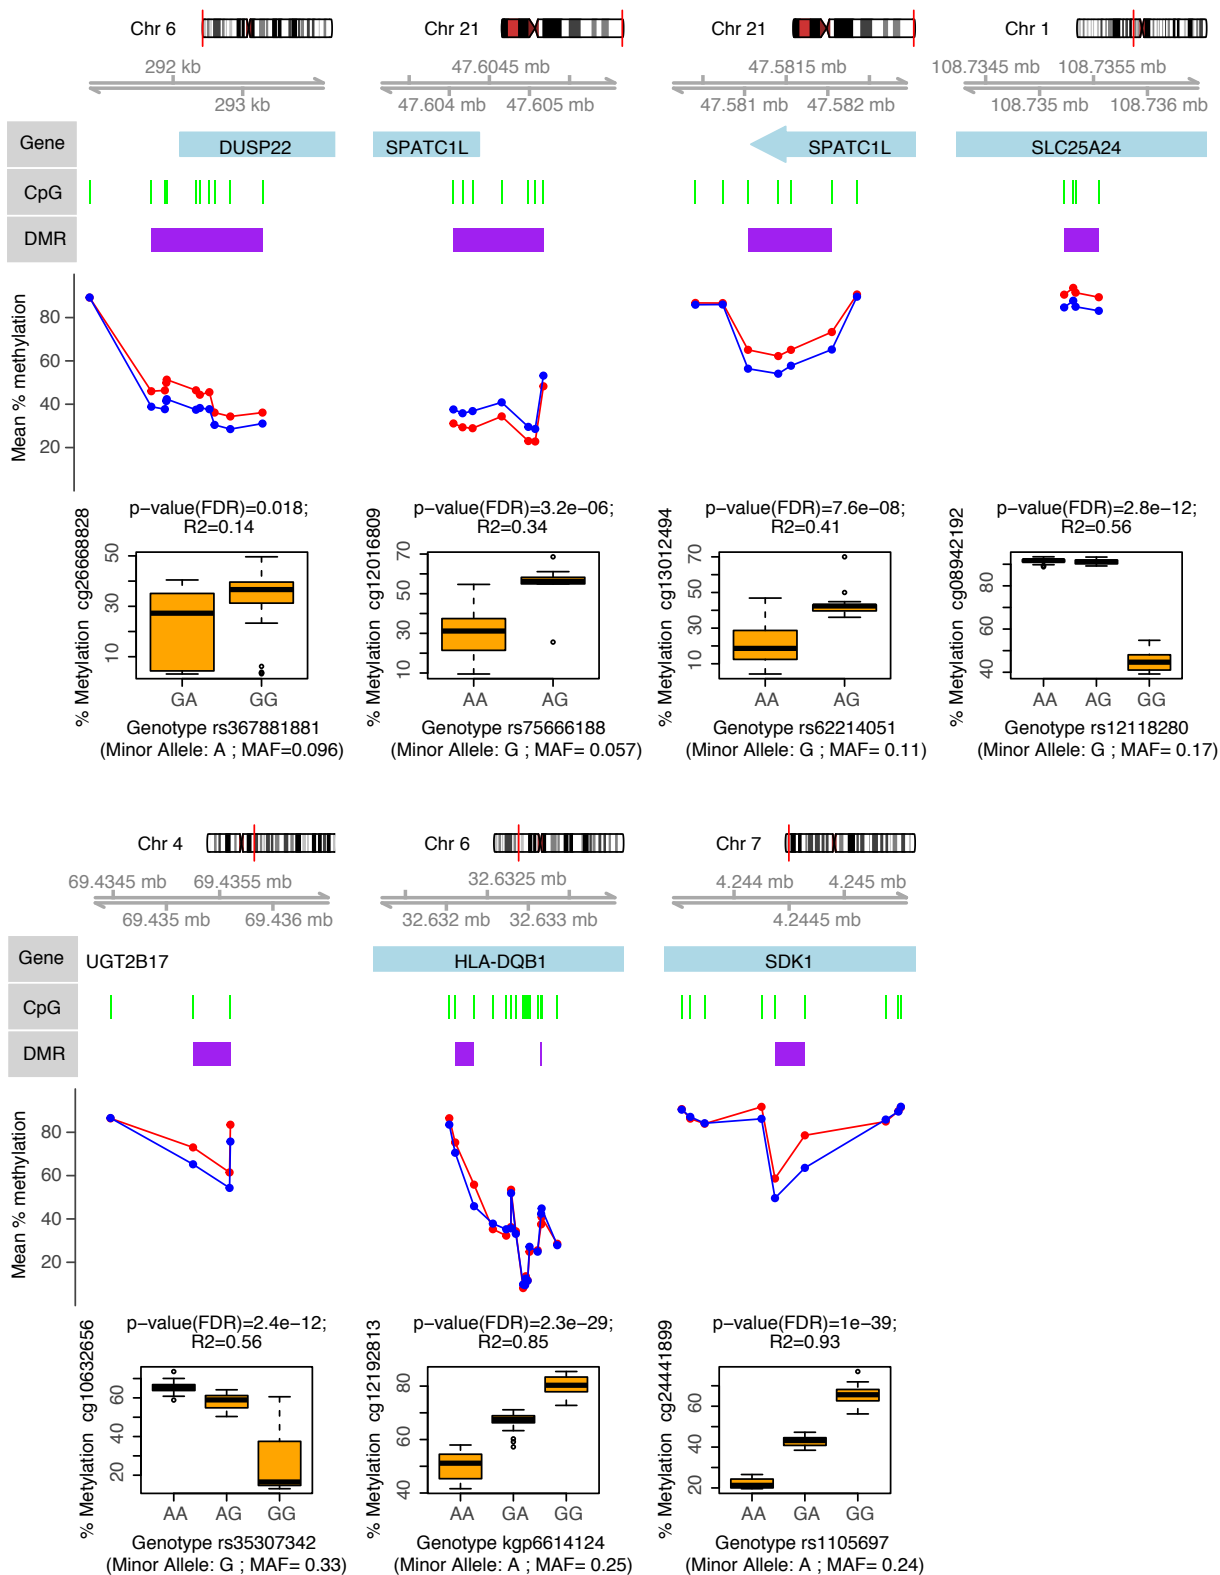

451

452 **Figure 6.** Genes associated with differentially methylated regions (DMR) in ME/CFS. Figure shows

453 DMP-containing DMRs identified from the analysis of methylation data from both sexes (healthy

454 controls, n = 36; vs. ME/CFS cases, n = 43) that were also identified from analysis of data females alone  
455 (healthy controls, n = 27; vs. ME/CFS cases, n = 34). Each panel shows (in descending order): 1) The  
456 chromosomal location of the gene/DMR; 2) The position of the DMPs (green bars) and DMR (purple  
457 bars) with respect to the gene (blue bars); 3) The mean percentage methylation difference between  
458 ME/CFS cases (red) and controls (blue) at each DMP; 4) The most significant meQTL association (as  
459 indicated by the  $R^2$  and p-values) between SNP genotype and the individual percentage methylation at the  
460 most significant DMP (as indicated by the p-value) within each DMR.

461  
462 These results suggest that ME/CFS patients have differential methylation patterns in T-  
463 cells that are strongly correlated with the underlying genotype. Understanding the mechanisms of  
464 these interactions is a promising direction of research in ME/CFS.

465

## 466 **Conclusions**

467 We identified over one hundred differentially methylated CpG loci associated with  
468 ME/CFS in T lymphocytes. Approximately half of these were clustered in differentially  
469 methylated regions of 500bp in size or less. Our data and analyses suggest that there is an  
470 indirect role of genotype influencing DNA methylation patterns associated with ME/CFS. We  
471 found no substantial large-effect direct associations of specific genotypes with ME/CFS disease  
472 phenotype. Larger scale genome wide association studies are necessary to test for potential  
473 small-effect associations between genotype and ME/CFS phenotype.

474

475 All of the methylation values at differentially methylated loci in T lymphocytes had  
476 significant correlations with specific genotypes at neighboring SNPs (within a window of 1  
477 Mbp), indicating that particular genetic backgrounds may influence methylation levels  
478 differently in ME/CFS patients than in controls. The genomic elements associated with genetic  
479 and epigenetic variants characteristic of ME/CFS patients in this study constitute targets for  
480 future research. Understanding the molecular mechanisms of genetic-epigenetic interactions of  
481 these targets will be key to develop new treatments for ME/CFS, and can serve as a model to  
482 understand the molecular basis of related complex diseases.

483

## 484 **Acknowledgements**

485 Funding for this research was provided by operating funds from the Solve ME/CFS  
486 Initiative. S.H. was supported by a CIHR Fellowship – Priority Announcement: Myalgic  
487 Encephalomyelitis/CFS/FM award number FRN 141047. We would like to thank Dr. Benjamin  
488 Hing for helpful discussions.

489

## 490 **Author contributions**

491 P.O.M. designed research; S.H. performed research; S.H. analyzed the data with  
492 contributions from W.C.D.V. and D.A.; S.D.V. contributed reagents/materials; S.H. wrote the  
493 manuscript with contributions from W.C.D.V., P.O.M., D.A. and S.D.V. All authors read and  
494 approved the final manuscript.

495

## 496 **Accession Codes**

497 SNP data will be made available through the NCBI dbSNP database, and methylation  
498 data through the NCBI GEO database, upon acceptance for publication.

499

## 500 **Competing financial interests**

501 The author(s) declare no competing financial interests.

502

## 503 **References**

504

- 505 1. Jason, L. A., Richman, J. A., Rademaker, A. W. & Jordan, K. M. A Community-Based  
506 Study of Chronic Fatigue Syndrome. *Arch. Intern. Med.* **159**, 2129–2137 (1999).
- 507 2. Jason, L. A., Benton, M. C., Valentine, L., Johnson, A. & Torres-Harding, S. The  
508 economic impact of ME/CFS: individual and societal costs. *Dyn. Med.* **7**, 6 (2008).
- 509 3. Hornig, M. *et al.* Distinct plasma immune signatures in ME/CFS are present early in the  
510 course of illness. *Sci. Adv.* **1**, e1400121 (2015).
- 511 4. Landi, A., Broadhurst, D., Vernon, S. D., Tyrrell, D. L. J. & Houghton, M. Reductions in



- 512 circulating levels of IL-16, IL-7 and VEGF-A in myalgic encephalomyelitis/chronic  
513 fatigue syndrome. *Cytokine* **78**, 27–36 (2016).
- 514 5. Brenu, E. W. *et al.* Role of adaptive and innate immune cells in chronic fatigue  
515 syndrome/myalgic encephalomyelitis. *Int. Immunol.* **26**, 233–242 (2014).
- 516 6. Brenu, E. W. *et al.* Immunological abnormalities as potential biomarkers in Chronic  
517 Fatigue Syndrome/Myalgic Encephalomyelitis. *J. Transl. Med.* **9**, 81 (2011).
- 518 7. Klimas, N. G., Salvato, F. R., Morgan, R. & Fletcher, M. A. Immunologic abnormalities  
519 in chronic fatigue syndrome. *J. Clin. Microbiol.* **28**, 1403–1410 (1990).
- 520 8. Fluge, Ø. *et al.* Benefit from b-lymphocyte depletion using the anti-CD20 antibody  
521 rituximab in chronic fatigue syndrome. a double-blind and placebo-controlled study. *PLoS*  
522 *One* **6**, (2011).
- 523 9. Gaab, J. *et al.* Low-dose dexamethasone suppression test in chronic fatigue syndrome and  
524 health. *Psychosom. Med.* **64**, 311–318 (2002).
- 525 10. Sánchez, J. A. & Dorado, D. Intragenomic ITS2 variation in Caribbean seafans.  
526 *Proceedings of the 11th International Coral Reef Symposium* 1383–1387 (2008). at  
527 <<http://www.nova.edu/ncr/11icrs/proceedings/files/m26-11.pdf>>
- 528 11. Brothers, L. L. *et al.* Evidence for extensive methane venting on the southeastern U.S.  
529 Atlantic margin. *Geology* **41**, 807–810 (2013).
- 530 12. Van Den Eede, F., Moorkens, G., Van Houdenhove, B., Cosyns, P. & Claes, S. J.  
531 Hypothalamic-pituitary-adrenal axis function in chronic fatigue syndrome.  
532 *Neuropsychobiology* **55**, 112–120 (2007).
- 533 13. Visser, J. *et al.* Increased Sensitivity to Glucocorticoids in Peripheral Blood Mononuclear  
534 Cells of Chronic Fatigue Syndrome Patients, Without Evidence for Altered Density or  
535 Affinity of Glucocorticoid Receptors. *J. Investig. Med.* **49**, 195–204 (2001).
- 536 14. de Vega, W. C., Herrera, S., Vernon, S. D. & McGowan, P. O. Epigenetic modifications  
537 and glucocorticoid sensitivity in Myalgic Encephalomyelitis/Chronic Fatigue Syndrome  
538 (ME/CFS). *BMC Med. Genomics* **10**, 11 (2017).
- 539 15. Schlauch, K. A. *et al.* Genome-wide association analysis identifies genetic variations in  
540 subjects with myalgic encephalomyelitis/chronic fatigue syndrome. *Transl. Psychiatry* **6**,  
541 e730 (2016).
- 542 16. Rajeevan, M. S., Dimulescu, I., Murray, J., Falkenberg, V. R. & Unger, E. R. Pathway-

- 543 focused genetic evaluation of immune and inflammation related genes with chronic  
544 fatigue syndrome. *Hum. Immunol.* **76**, 553–560 (2015).
- 545 17. Smith, A. K., Fang, H., Whistler, T., Unger, E. R. & Rajeevan, M. S. Convergent genomic  
546 studies identify association of GRIK2 and NPAS2 with chronic fatigue syndrome.  
547 *Neuropsychobiology* **64**, 183–194 (2011).
- 548 18. de Vega, W. C., Vernon, S. D. & McGowan, P. O. DNA Methylation Modifications  
549 Associated with Chronic Fatigue Syndrome. *PLoS One* **9**, e104757 (2014).
- 550 19. Brenu, E. W., Staines, D. R. & Marshall-Gradisnik, S. M. Methylation Profile of CD4+ T  
551 Cells in Chronic Fatigue Syndrome/Myalgic Encephalomyelitis. *J. Clin. Cell. Immunol.* **5**,  
552 (2014).
- 553 20. Viser, J. CD4 T lymphocytes from patients with chronic fatigue syndrome have a  
554 decreased interferon gamma production and increased sensitivity to dexamethasone. *J.*  
555 *Infect. Dis.* **177**, 451–454 (1998).
- 556 21. Evengard, B., Jacks, A., Pedersen, N. L. & Sullivan, P. F. The epidemiology of chronic  
557 fatigue in the Swedish Twin Registry. *Psychol. Med.* **35**, 1317 (2005).
- 558 22. Reyes, M. *et al.* Prevalence and incidence of chronic fatigue syndrome in Wichita,  
559 Kansas. *Arch. Intern. Med.* **163**, 1530–1536 (2003).
- 560 23. Reeves, W. C. *et al.* Prevalence of chronic fatigue syndrome in metropolitan, urban, and  
561 rural Georgia. *Popul. Health Metr.* **5**, 5 (2007).
- 562 24. Fukuda, K. *et al.* The chronic fatigue syndrome: a comprehensive approach to its  
563 definition and study. International Chronic Fatigue Syndrome Study Group. *Ann. Intern.*  
564 *Med.* **121**, 953–959 (1994).
- 565 25. Carruthers, B. M. *et al.* Myalgic Encephalomyelitis / Chronic Fatigue Syndrome : Clinical  
566 Working Case Definition , Diagnostic and Treatment Protocols. *J. Chronic Fatigue Syndr.*  
567 **11**, 7–36 (2003).
- 568 26. Hays, R. D., Sherbourne, C. D. & Mazel, R. M. The rand 36-item health survey 1.0.  
569 *Health Econ.* **2**, 217–227 (1993).
- 570 27. Karssen, L. C., van Duijn, C. M. & Aulchenko, Y. S. The GenABEL Project for statistical  
571 genomics. *F1000Research* **5**, 914 (2016).
- 572 28. Purcell, S. *et al.* PLINK: A tool set for whole-genome association and population-based  
573 linkage analyses. *Am. J. Hum. Genet.* **81**, 559–575 (2007).

- 574 29. Anderson, C. A. *et al.* Data quality control in genetic case-control association studies. *Nat.*  
575 *Protoc.* **5**, 1564–1573 (2010).
- 576 30. Clarke, G. M. *et al.* Basic statistical analysis in genetic case-control studies. *Nat. Protoc.*  
577 **6**, 121–33 (2011).
- 578 31. Patterson, N., Price, A. L. & Reich, D. Population structure and eigenanalysis. *PLoS*  
579 *Genet.* **2**, 2074–2093 (2006).
- 580 32. Price, A. L. *et al.* Principal components analysis corrects for stratification in genome-wide  
581 association studies. *Nat. Genet.* **38**, 904–909 (2006).
- 582 33. Dunn, O. J. Multiple Comparisons Among Means. *J. Am. Stat. Assoc.* **56**, 52–64 (1961).
- 583 34. Holm, S. A Simple Sequentially Rejective Multiple Test Procedure. *Scand. J. Stat.* **6**, 65–  
584 70 (1979).
- 585 35. Benjamini, Y. & Hochberg, Y. Controlling the false discovery rate: a practical and  
586 powerful approach to multiple testing. *J. R. Stat. Soc. B* **57**, 289–300 (1995).
- 587 36. Barrett, J. C., Fry, B., Maller, J. & Daly, M. J. Haploview: Analysis and visualization of  
588 LD and haplotype maps. *Bioinformatics* **21**, 263–265 (2005).
- 589 37. MacArthur, J. *et al.* The new NHGRI-EBI Catalog of published genome-wide association  
590 studies (GWAS Catalog). *Nucleic Acids Res.* **45**, D896–D901 (2017).
- 591 38. Aken, B. L. *et al.* Ensembl 2017. *Nucleic Acids Res.* **45**, D635–D642 (2017).
- 592 39. Arnold, M., Raffler, J., Pfeufer, A., Suhre, K. & Kastenmüller, G. SNIIPA: an interactive,  
593 genetic variant-centered annotation browser. *Bioinformatics* **31**, 1334–1336 (2015).
- 594 40. GTEx Consortium. The Genotype-Tissue Expression (GTEx) project. *Nat. Genet.* **45**,  
595 580–585 (2013).
- 596 41. Suhre, K. *et al.* Connecting genetic risk to disease end points through the human blood  
597 plasma proteome. *Nat. Commun.* **8**, 14357 (2017).
- 598 42. Hannon, E. *et al.* Methylation QTLs in the developing brain and their enrichment in  
599 schizophrenia risk loci. *Nat. Neurosci.* **19**, 48–54 (2016).
- 600 43. Carvalho, B. S., Louis, T. A. & Irizarry, R. A. Quantifying uncertainty in genotype calls.  
601 *Bioinformatics* **26**, 242–249 (2010).
- 602 44. Scharpf, R. B., Irizarry, R. A., Ritchie, M. E., Carvalho, B. & Ruczinski, I. Using the R  
603 Package *crlmm* for genotyping and copy number estimation. *J. Stat. Softw.* **40**, 1–32  
604 (2011).

- 605 45. Machiela, M. J. & Chanock, S. J. LDlink: a web-based application for exploring  
606 population-specific haplotype structure and linking correlated alleles of possible  
607 functional variants. *Bioinformatics* **31**, 3555–3557 (2015).
- 608 46. de Leeuw, C. A., Mooij, J. M., Heskes, T. & Posthuma, D. MAGMA: Generalized Gene-  
609 Set Analysis of GWAS Data. *PLOS Comput. Biol.* **11**, e1004219 (2015).
- 610 47. Subramanian, A. *et al.* Gene set enrichment analysis: a knowledge-based approach for  
611 interpreting genome-wide expression profiles. *Proc. Natl. Acad. Sci. U. S. A.* **102**, 15545–  
612 15550 (2005).
- 613 48. Liberzon, A. *et al.* The Molecular Signatures Database (MSigDB) hallmark gene set  
614 collection. *Cell Syst.* **1**, 417–425 (2015).
- 615 49. Aryee, M. J. *et al.* Minfi: A flexible and comprehensive Bioconductor package for the  
616 analysis of Infinium DNA methylation microarrays. *Bioinformatics* **30**, 1363–1369  
617 (2014).
- 618 50. Wilhelm-Benartzi, C. S. *et al.* Review of processing and analysis methods for DNA  
619 methylation array data. *Br. J. Cancer* **109**, 1394–402 (2013).
- 620 51. Maksimovic, J., Gordon, L. & Oshlack, A. SWAN: Subset-quantile within array  
621 normalization for illumina infinium HumanMethylation450 BeadChips. *Genome Biol.* **13**,  
622 R44 (2012).
- 623 52. Du, P. *et al.* Comparison of Beta-value and M-value methods for quantifying methylation  
624 levels by microarray analysis. *BMC Bioinformatics* **11**, 587 (2010).
- 625 53. Johnson, W. E., Li, C. & Rabinovic, A. Adjusting batch effects in microarray expression  
626 data using empirical Bayes methods. *Biostatistics* **8**, 118–127 (2007).
- 627 54. Jaffe, A. E. *et al.* Bump hunting to identify differentially methylated regions in epigenetic  
628 epidemiology studies. *Int. J. Epidemiol.* **41**, 200–209 (2012).
- 629 55. Shabalin, A. A. Matrix eQTL: Ultra fast eQTL analysis via large matrix operations.  
630 *Bioinformatics* **28**, 1353–1358 (2012).
- 631 56. Kuhn, R. M. *et al.* The UCSC Genome Browser Database: update 2009. *Nucleic Acids*  
632 *Res.* **37**, D755–D761 (2009).
- 633 57. Yu, G., Wang, L.-G., Han, Y. & He, Q.-Y. clusterProfiler: an R package for comparing  
634 biological themes among gene clusters. *OMICS* **16**, 284–287 (2012).
- 635 58. Ashburner, M. *et al.* Gene ontology: tool for the unification of biology. *The Gene*

- 636           Ontology Consortium. *Nat. Genet.* **25**, 25–29 (2000).
- 637   59.   Gene Ontology Consortium. Gene Ontology Consortium: going forward. *Nucleic Acids*  
638       *Res.* **43**, D1049–D1056 (2015).
- 639   60.   Kanehisa, M. & Goto, S. KEGG: kyoto encyclopedia of genes and genomes. *Nucleic*  
640       *Acids Res.* **28**, 27–30 (2000).
- 641   61.   Kanehisa, M., Goto, S., Sato, Y., Furumichi, M. & Tanabe, M. KEGG for integration and  
642       interpretation of large-scale molecular data sets. *Nucleic Acids Res.* **40**, D109–14 (2012).
- 643   62.   Yu, G. & He, Q.-Y. ReactomePA: an R/Bioconductor package for reactome pathway  
644       analysis and visualization. *Mol. Biosyst.* **12**, 477–479 (2016).
- 645   63.   Yu, G., Wang, L.-G., Yan, G.-R. & He, Q.-Y. DOSE: an R/Bioconductor package for  
646       disease ontology semantic and enrichment analysis. *Bioinformatics* **31**, 608–609 (2015).
- 647   64.   Curriu, M. *et al.* Screening NK-, B- and T-cell phenotype and function in patients  
648       suffering from Chronic Fatigue Syndrome. *J. Transl. Med.* **11**, 68 (2013).
- 649   65.   Hardcastle, S. L. *et al.* Characterisation of cell functions and receptors in Chronic Fatigue  
650       Syndrome/Myalgic Encephalomyelitis (CFS/ME). *BMC Immunol.* **16**, 35 (2015).
- 651   66.   Little, T. J., Horowitz, M. & Feinle-Bisset, C. Role of cholecystokinin in appetite control  
652       and body weight regulation. *Obes. Rev.* **6**, 297–306 (2005).
- 653   67.   Lignon, M. F., Bernad, N. & Martinez, J. Cholecystokinin receptors in cells of the  
654       immune system. *Ann. N. Y. Acad. Sci.* **713**, 334–337 (1994).
- 655   68.   Weiland, T. J., Voudouris, N. J. & Kent, S. CCK(2) receptor nullification attenuates  
656       lipopolysaccharide-induced sickness behavior. *Am. J. Physiol. Regul. Integr. Comp.*  
657       *Physiol.* **292**, R112–R123 (2007).
- 658   69.   Morris, G., Anderson, G., Galecki, P., Berk, M. & Maes, M. A narrative review on the  
659       similarities and dissimilarities between myalgic encephalomyelitis/chronic fatigue  
660       syndrome (ME/CFS) and sickness behavior. *BMC Med.* **11**, 64 (2013).
- 661   70.   Chung, S. *et al.* Identification of preoptic sleep neurons using retrograde labelling and  
662       gene profiling. *Nature* **545**, 477–481 (2017).
- 663   71.   Zhang, J.-G. *et al.* Cholecystokinin octapeptide regulates the differentiation and effector  
664       cytokine production of CD4(+) T cells in vitro. *Int. Immunopharmacol.* **20**, 307–315  
665       (2014).
- 666   72.   Geibel, M. *et al.* Ablation of TrkB signalling in CCK neurons results in hypercortisolism

- 667 and obesity. *Nat. Commun.* **5**, 3427 (2014).
- 668 73. Spada, J. *et al.* Genome-wide association analysis of actigraphic sleep phenotypes in the  
669 LIFE Adult Study. *J. Sleep Res.* **25**, 690–701 (2016).
- 670 74. Guo, C. *et al.* Myeloid-derived suppressor cells have a proinflammatory role in the  
671 pathogenesis of autoimmune arthritis. *Ann. Rheum. Dis.* **75**, 278–285 (2016).
- 672 75. Graves, M. C. *et al.* Methylation differences at the HLA-DRB1 locus in CD4+ T-Cells are  
673 associated with multiple sclerosis. *Mult. Scler.* **20**, 1033–41 (2014).
- 674 76. Maes, M. *Inflammatory and oxidative and nitrosative stress pathways underpinning*  
675 *chronic fatigue, somatization and psychosomatic symptoms. Current opinion in psychiatry*  
676 **22**, (2009).
- 677 77. Morris, G. *et al.* Nitrosative Stress, Hypernitrosylation, and Autoimmune Responses to  
678 Nitrosylated Proteins: New Pathways in Neuroprogressive Disorders Including Depression  
679 and Chronic Fatigue Syndrome. *Mol. Neurobiol.* **54**, 4271–4291 (2017).
- 680 78. Naviaux, R. K. *et al.* Metabolic features of chronic fatigue syndrome. *Proc. Natl. Acad.*  
681 *Sci.* 201607571 (2016). doi:10.1073/pnas.1607571113
- 682 79. Heyn, H. *et al.* DNA methylation contributes to natural human variation. *Genome Res.* **23**,  
683 1363–1372 (2013).
- 684 80. Glossop, J. R. *et al.* Genome-wide DNA methylation profiling in rheumatoid arthritis  
685 identifies disease-associated methylation changes that are distinct to individual T- and B-  
686 lymphocyte populations. *Epigenetics* **9**, 1228–1237 (2014).
- 687 81. Li, J.-P. *et al.* The phosphatase JKAP/DUSP22 inhibits T-cell receptor signalling and  
688 autoimmunity by inactivating Lck. *Nat. Commun.* **5**, 1–13 (2014).
- 689
